# Supplementary material
Source: PubMed Central journal article supplement (PMC5003628)

Figure 1

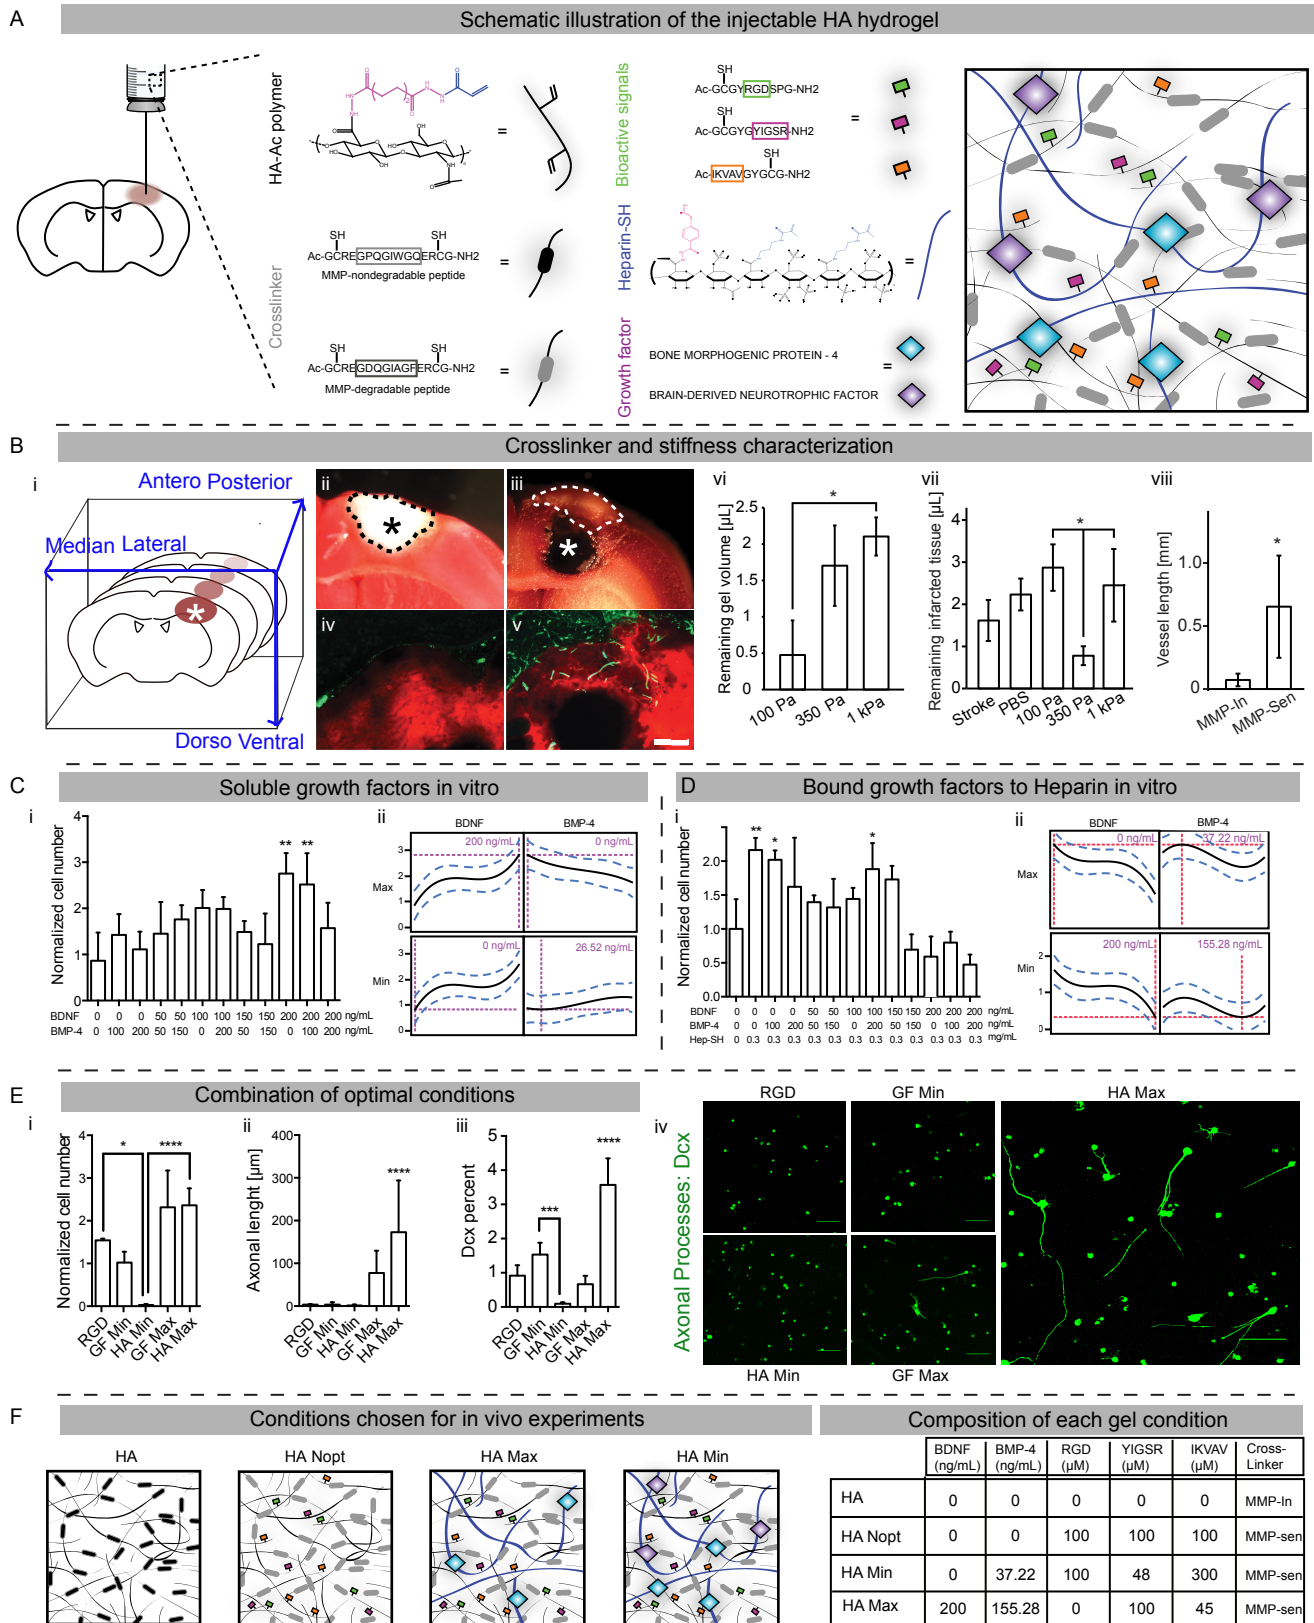

Figure 2

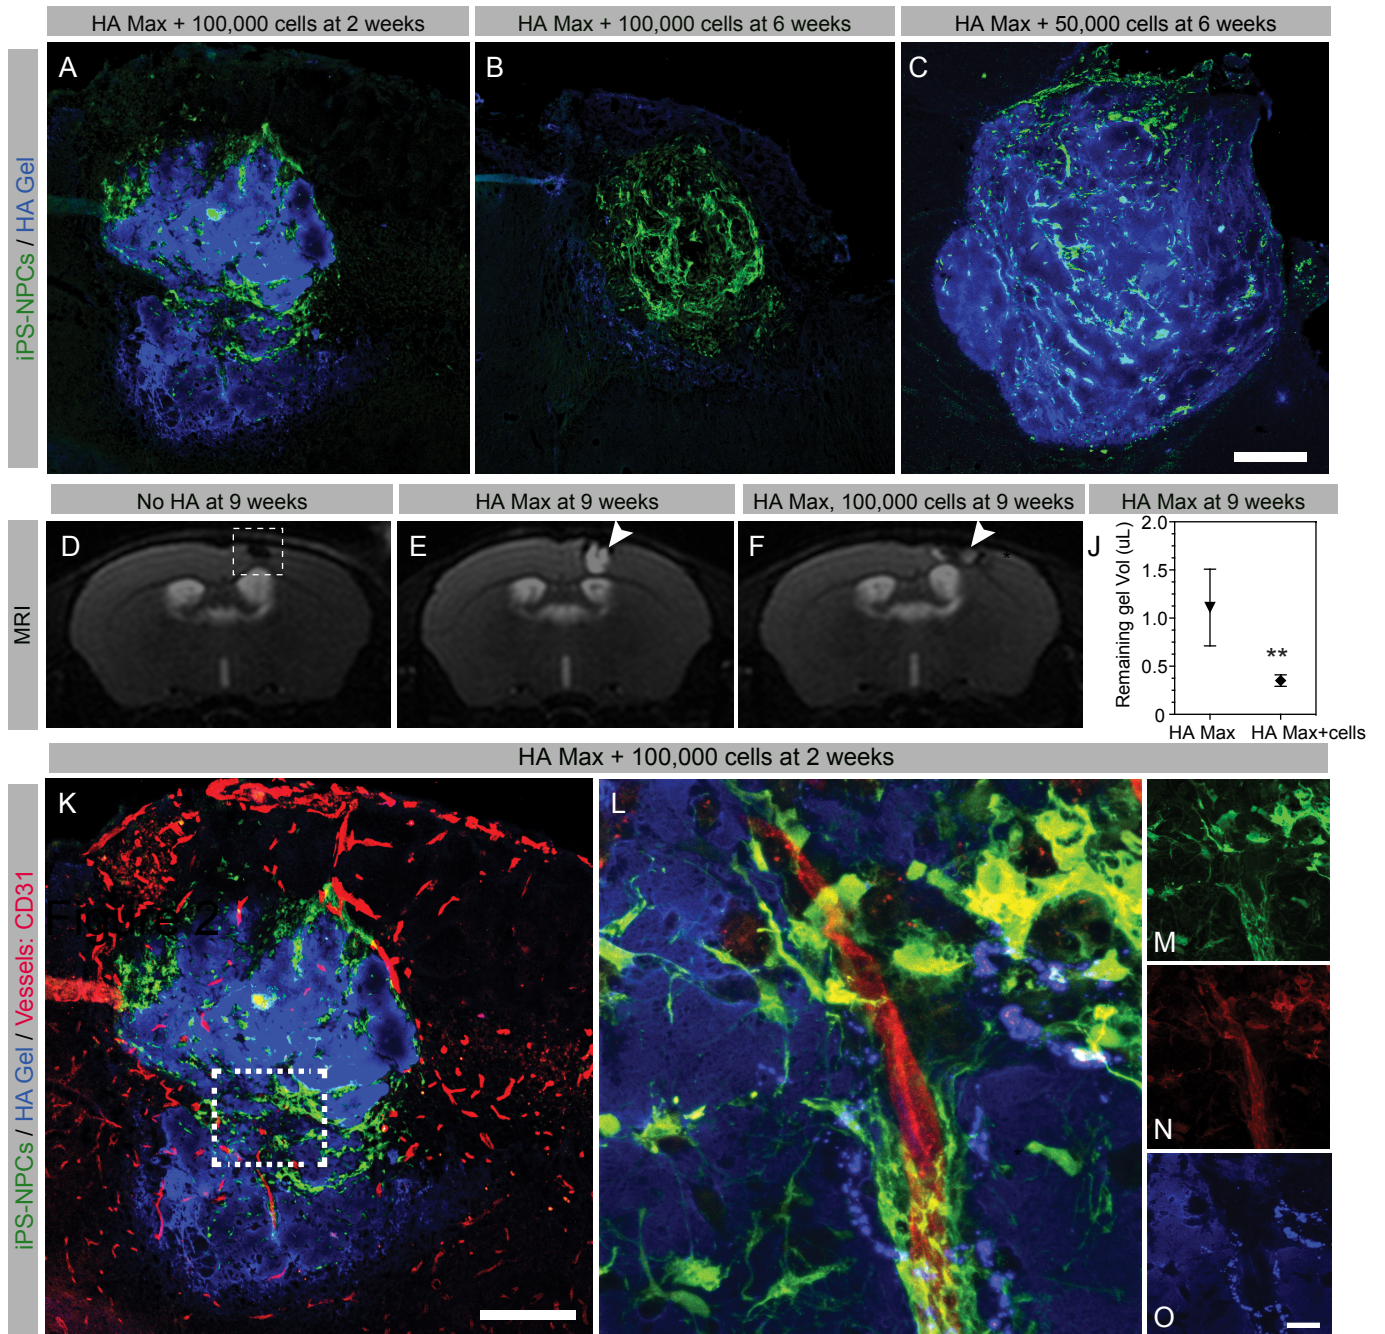



Figure 3

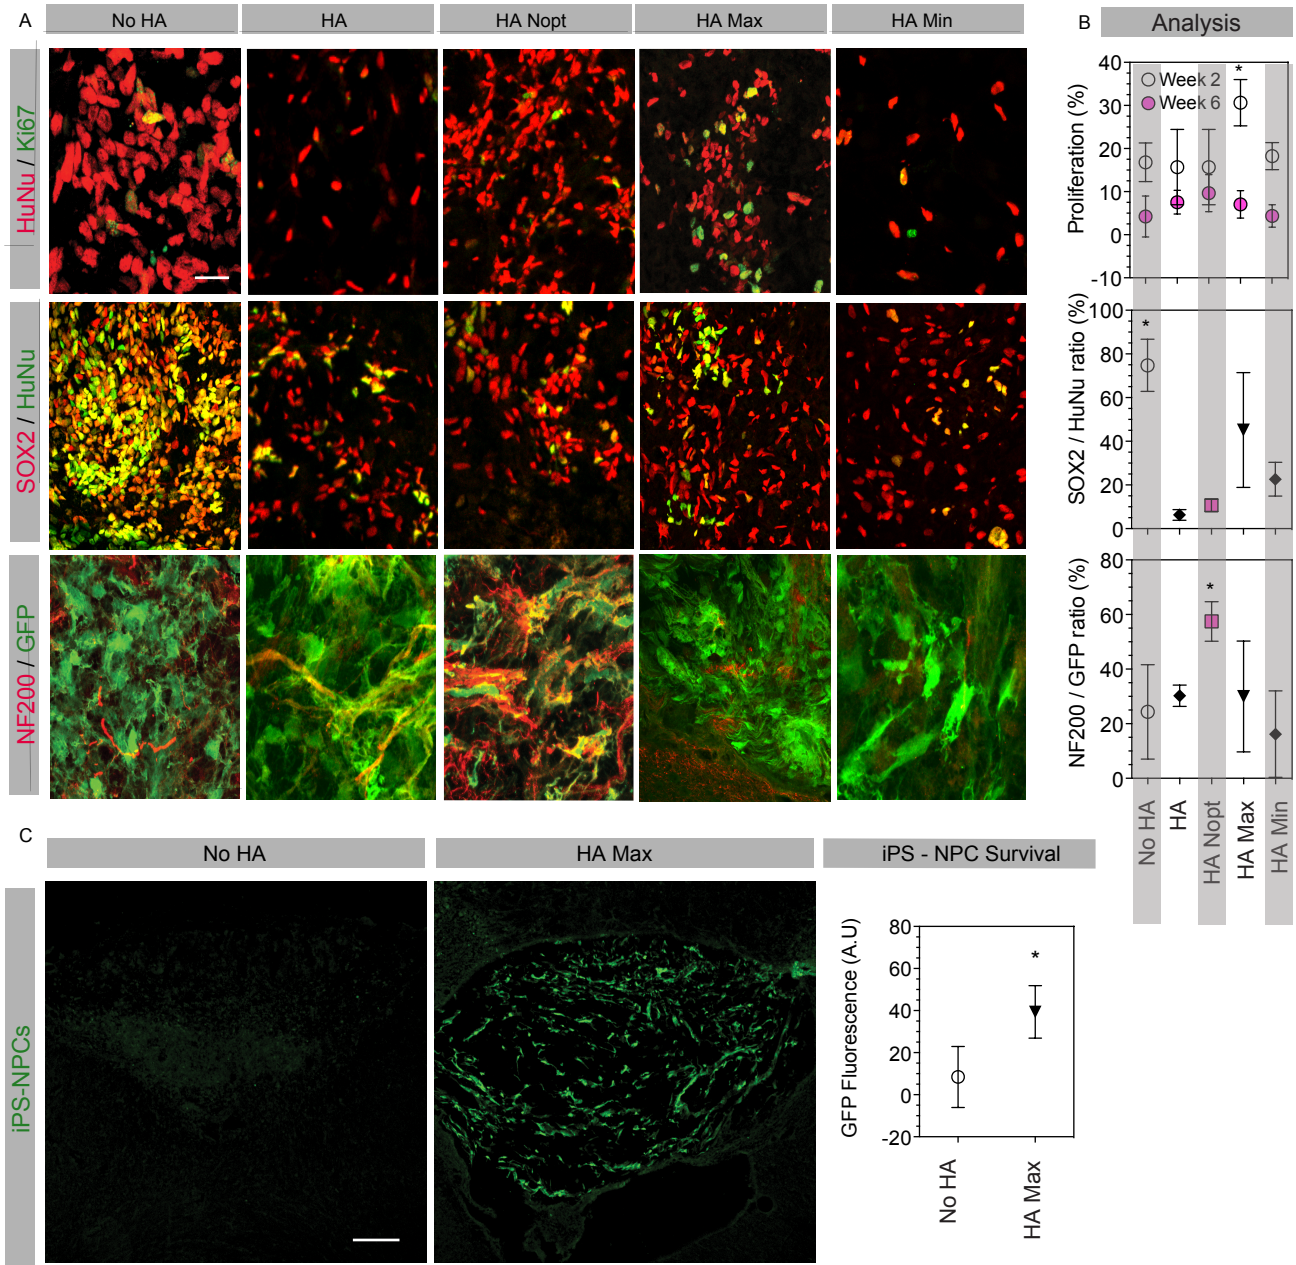

Figure 4

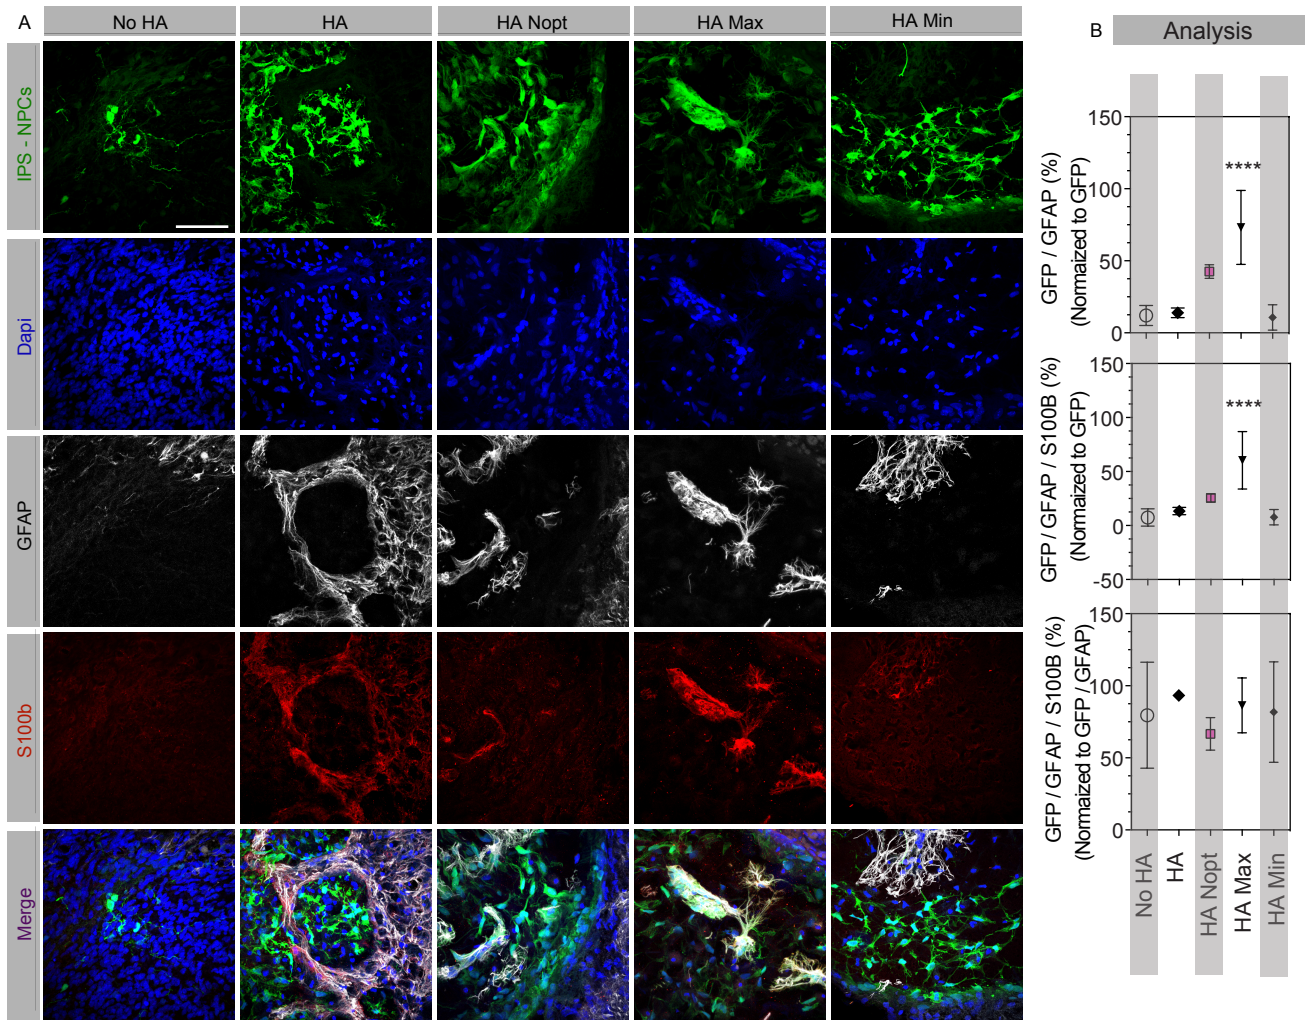

Supplement: NIHMS807507-supplement-1.pdf [file NIHMS807507-supplement-1.pdf]
